# Supplementary material for: Explainable machine learning approach to predict extubation in critically ill ventilated patients: a retrospective study in central Taiwan
Source: PubMed Central journal article supplement (PMC9664699; doi:10.1186/s12871-022-01888-y), 2022-11-14
Supplement: 12871_2022_1888_MOESM1_ESM.pdf [file 12871_2022_1888_MOESM1_ESM.pdf]

**Supplemental Table 1. Plausible range of data and proportion of missing data among the top 20 features with high feature importance**

| <b>Variables</b>              | <b>Plausible range</b> | <b>Proportion of missing data</b> |
|-------------------------------|------------------------|-----------------------------------|
| <b>Age, years</b>             | 1-100                  | 0.0%                              |
| <b>Ventilator-day</b>         | 1-60                   | 0.0%                              |
| <b>Day -2</b>                 |                        |                                   |
| <b>GCS</b>                    | 3-15                   | 1.3%                              |
| <b>Urine output, ml</b>       | 0-5,000                | 0.0%                              |
| <b>Injection amount, ml</b>   | 0-10,000               | 0.0%                              |
| <b>Diet amount, ml</b>        | 0-3,000                | 0.0%                              |
| <b>RASS level</b>             | -5--+4                 | 1.3%                              |
| <b>Ppeak, cmH2O</b>           | 0-50                   | 3.6%                              |
| <b>Respiratory rate, /min</b> | 0-40                   | 0.2%                              |
| <b>MAP, cmH2O</b>             | 10-40                  | 3.9%                              |
| <b>Heart rate, /min</b>       | 0-300                  | 0.2%                              |
| <b>Day -3</b>                 |                        |                                   |
| <b>GCS</b>                    | 3-15                   | 0.5%                              |
| <b>Urine output, ml</b>       | 0-5,000                | 0.0%                              |
| <b>Injection amount, ml</b>   | 0-10,000               | 0.0%                              |
| <b>Diet amount, ml</b>        | 0-3,000                | 0.0%                              |
| <b>RASS level</b>             | -5--+4                 | 1.2%                              |
| <b>Ppeak, cmH2O</b>           | 0-50                   | 2.7%                              |
| <b>Respiratory rate, /min</b> | 0-40                   | 0.0%                              |
| <b>MAP, cmH2O</b>             | 10-40                  | 2.8%                              |
| <b>Heart rate, /min</b>       | 0-300                  | 0.0%                              |

Abbreviations: GCS, Glasgow coma scale; RASS, Richmond agitation-sedation scale; Ppeak, peak airway pressure; MAP, mean airway pressure.

**Supplemental Table 2. Metrics of performance of distinct machine learning models to predict weaning**

|                                                               | <b>Models</b>   | <b>Precision</b> | <b>Specificity</b> | <b>Sensitivity</b> | <b>F-1</b>    | <b>Brier Score</b> | <b>Accuracy<sup>a</sup></b> |
|---------------------------------------------------------------|-----------------|------------------|--------------------|--------------------|---------------|--------------------|-----------------------------|
| <b>Validation<br/>(80%)<br/>(5-fold cross<br/>validation)</b> | <b>LR</b>       | 0.602 ± 0.012    | 0.777 ± 0.006      | 0.818± 0.008       | 0.693 ± 0.010 | 0.144 ± 0.002      | 0.793 ± 0.004               |
|                                                               | <b>RF</b>       | 0.660 ± 0.013    | 0.810 ± 0.010      | 0.891 ± 0.009      | 0.757 ± 0.008 | 0.116 ± 0.004      | 0.834 ± 0.008               |
|                                                               | <b>CatBoost</b> | 0.695 ± 0.010    | 0.846 ± 0.003      | 0.853 ± 0.002      | 0.766 ± 0.006 | 0.106 ± 0.004      | 0.848 ± 0.002               |
|                                                               | <b>LightGBM</b> | 0.710 ± 0.010    | 0.858 ± 0.002      | 0.842 ± 0.003      | 0.771 ± 0.006 | 0.102 ± 0.003      | 0.854 ± 0.001               |
|                                                               | <b>XGBoost</b>  | 0.732 ± 0.011    | 0.878 ± 0.006      | 0.806± 0.008       | 0.767 ± 0.009 | 0.101 ± 0.003      | 0.857± 0.006                |
| <b>Testing<br/>(20%)</b>                                      | <b>LR</b>       | 0.599            | 0.777              | 0.815              | 0.691         | 0.148              | 0.788                       |
|                                                               | <b>RF</b>       | 0.665            | 0.818              | 0.881              | 0.758         | 0.118              | 0.837                       |
|                                                               | <b>CatBoost</b> | 0.688            | 0.844              | 0.842              | 0.757         | 0.108              | 0.843                       |
|                                                               | <b>LightGBM</b> | 0.692            | 0.848              | 0.839              | 0.759         | 0.105              | 0.845                       |
|                                                               | <b>XGBoost</b>  | 0.720            | 0.873              | 0.798              | 0.757         | 0.103              | 0.852                       |

<sup>a</sup>(TP+TN) / (TP+FN+TN+FP). Abbreviation: LR, logistic regression; RF, random forest, CatBoost, categorical boosting; LightGBM, light gradient boosting machine; XGBoost, Extreme gradient boosting.

**Supplemental Table 3. Delong test to determine the difference of performance among distinct machine learning models**

|                 | <b>XGBoost</b> | <b>RF</b> | <b>LR</b> | <b>CatBoost</b> | <b>LightGBM</b> |
|-----------------|----------------|-----------|-----------|-----------------|-----------------|
| <b>XGBoost</b>  | NA             | <0.01     | <0.01     | 0.25            | 0.21            |
| <b>RF</b>       | <0.01          | NA        | <0.01     | 0.011           | <0.01           |
| <b>LR</b>       | <0.01          | <0.01     | NA        | <0.001          | <0.01           |
| <b>CatBoost</b> | 0.25           | 0.01      | <0.01     | NA              | 0.06            |
| <b>LightGBM</b> | 0.21           | <0.01     | <0.01     | 0.06            | NA              |

Abbreviation: XGBoost, Extreme gradient boosting; RF, random forest; LR, logistic regression; CatBoost, categorical boosting; LightGBM, light gradient boosting machine; NA, not available.

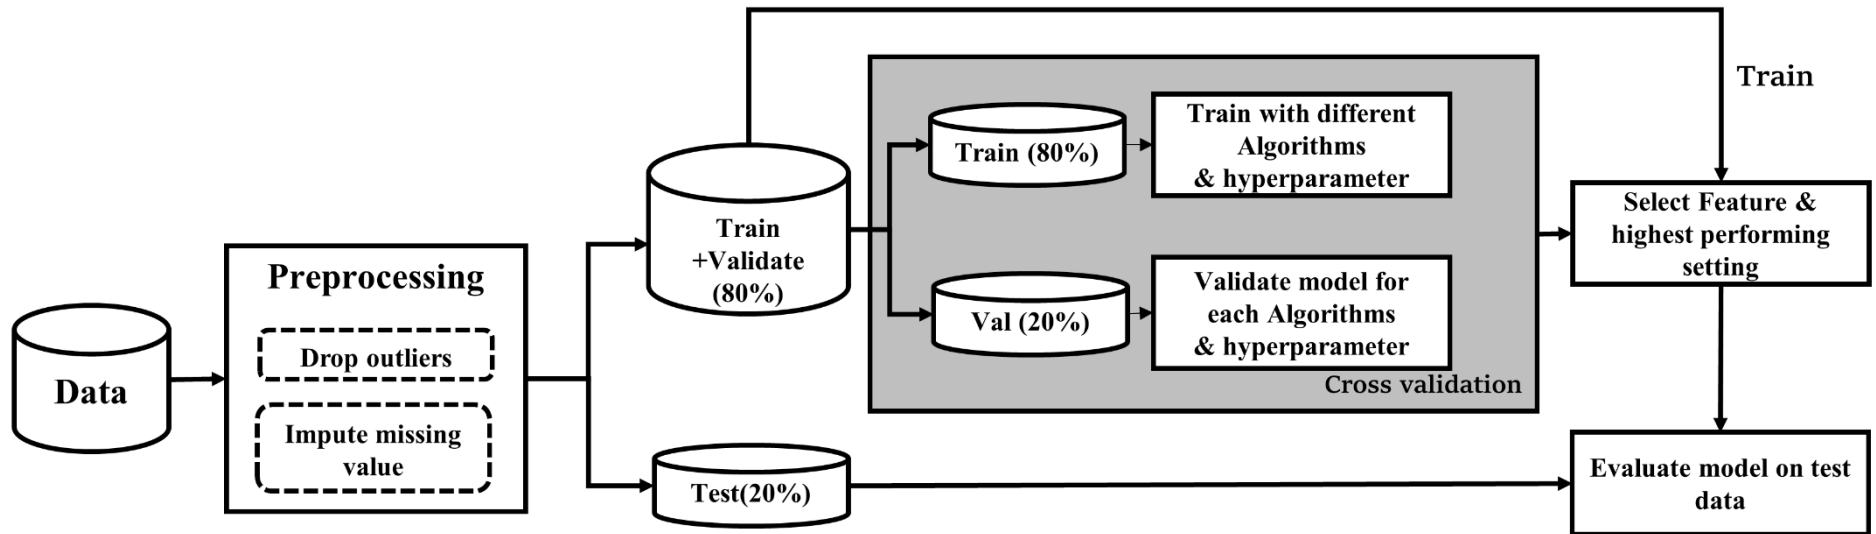

Supplemental Figure 1. Flow diagram of the analytic pipeline in the study

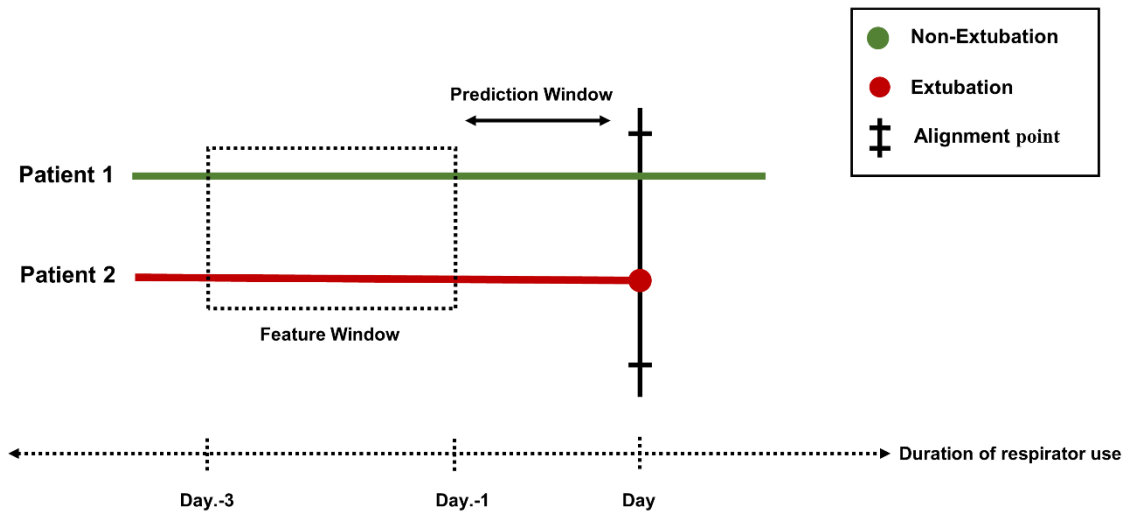

**Supplemental Figure 2. Illustration of the study design and the time frame with right alignment.** Subjects were aligned at the alignment point that was extubation-day or one random-day in those without extubation. The data within prediction window (day -3 and day -2 prior to extubation-day) were collected, and the prediction window reflects the time of the prediction ahead of extubation.

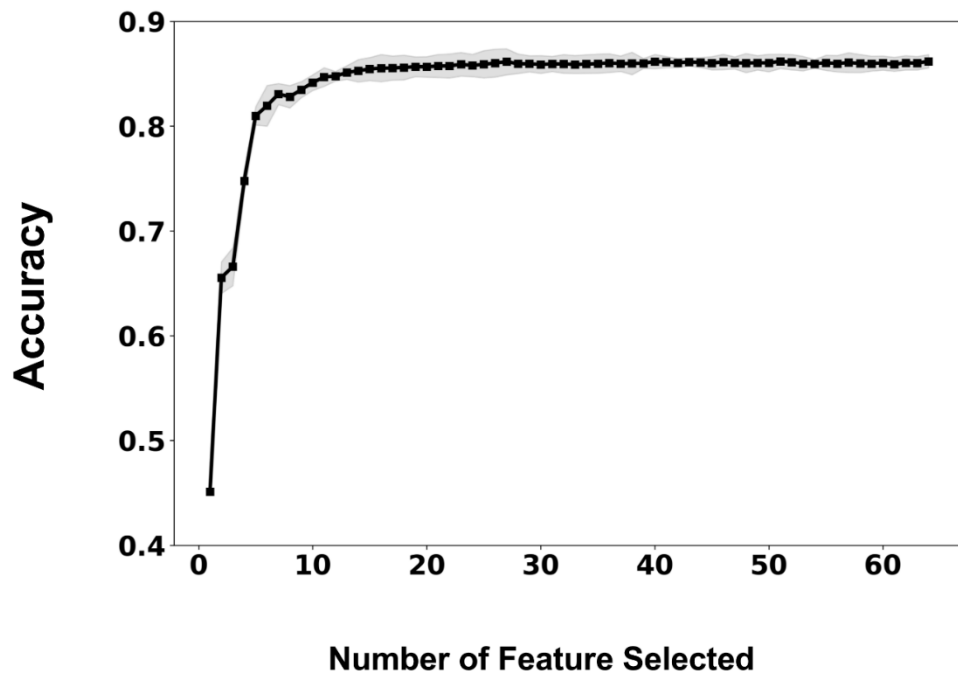

**Supplemental Figure 3: Recursive feature elimination to explore the accuracy of model using distinct numbers of the feature to predict extubation in critically ill ventilated patients**

**A**

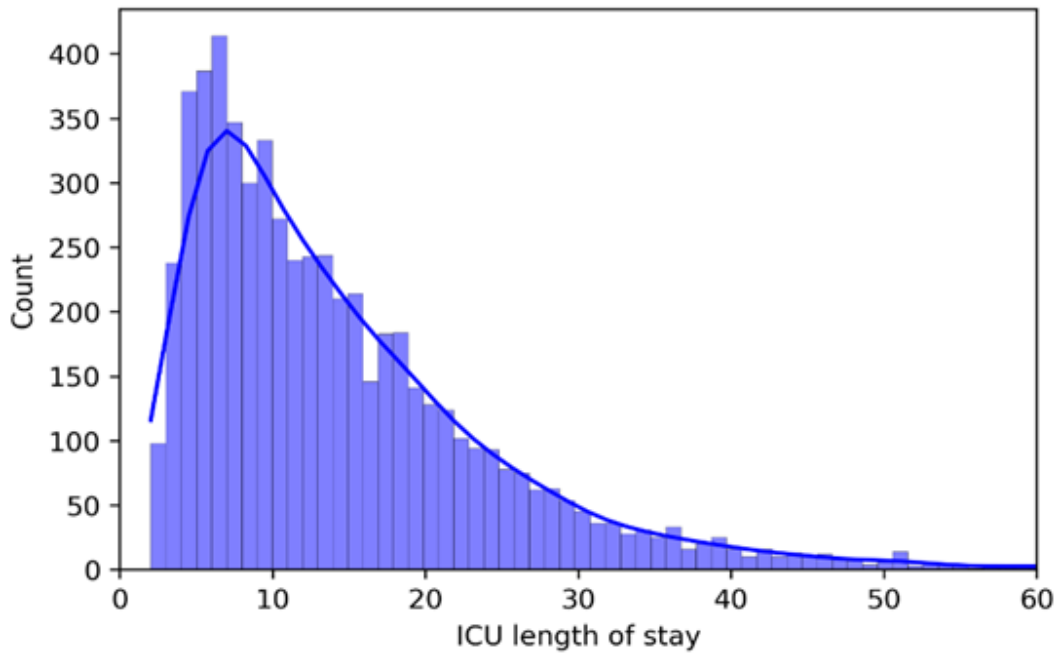

**B**

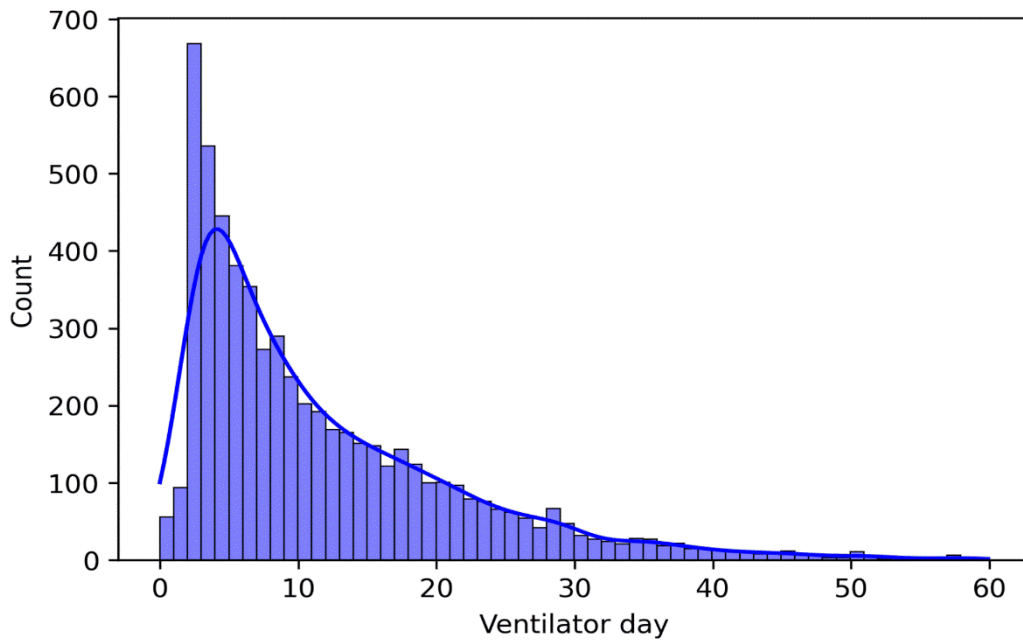

**Supplemental Figure 4. Histograms of hospital length of stay (A) and ventilator-day (B) among enrolled subjects.**

D3 :

Extubation Probability : **0.17**

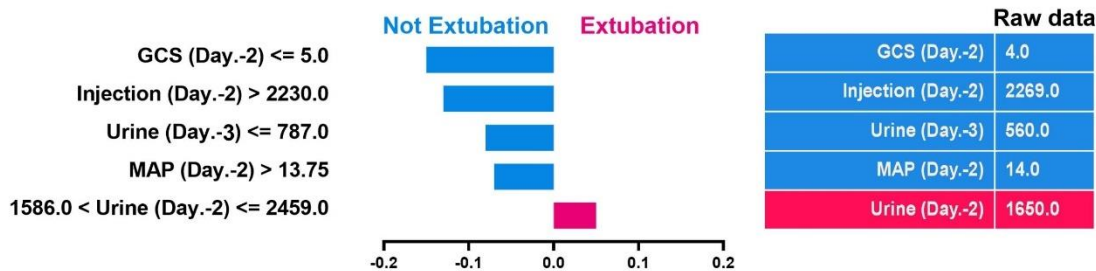

D4 :

Extubation Probability : **0.39**

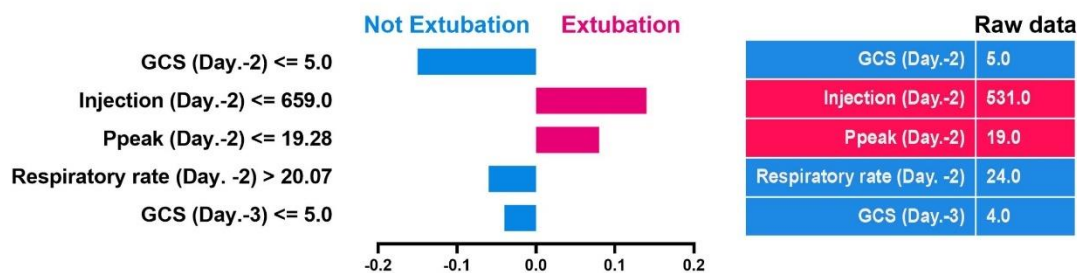

D5 :

Extubation Probability : **0.79**

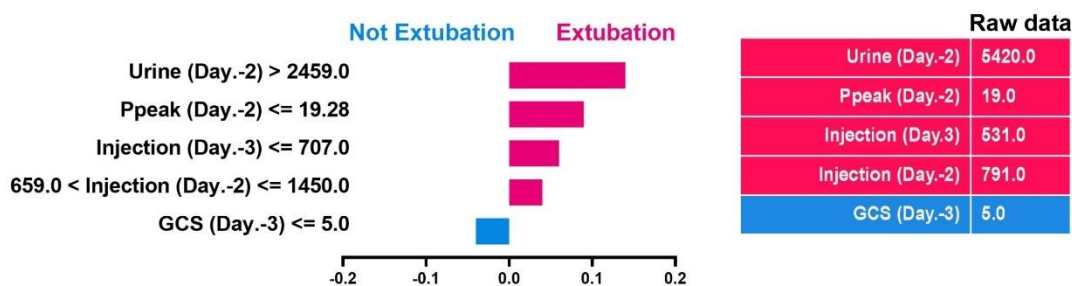

D6 :

Extubation Probability : **0.92**

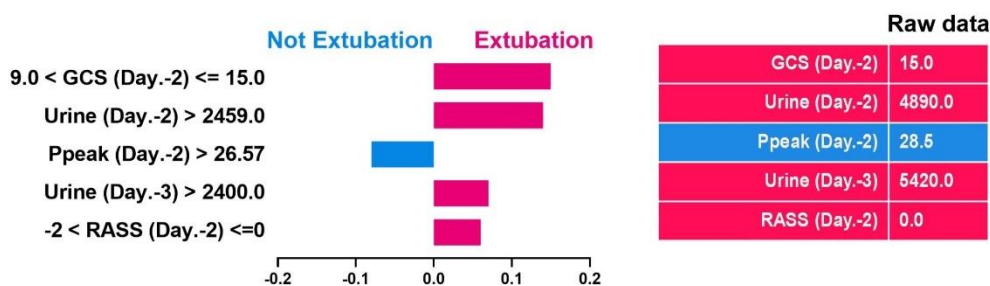

Supplemental Figure 5. Serial explainable predictions of one individual patient



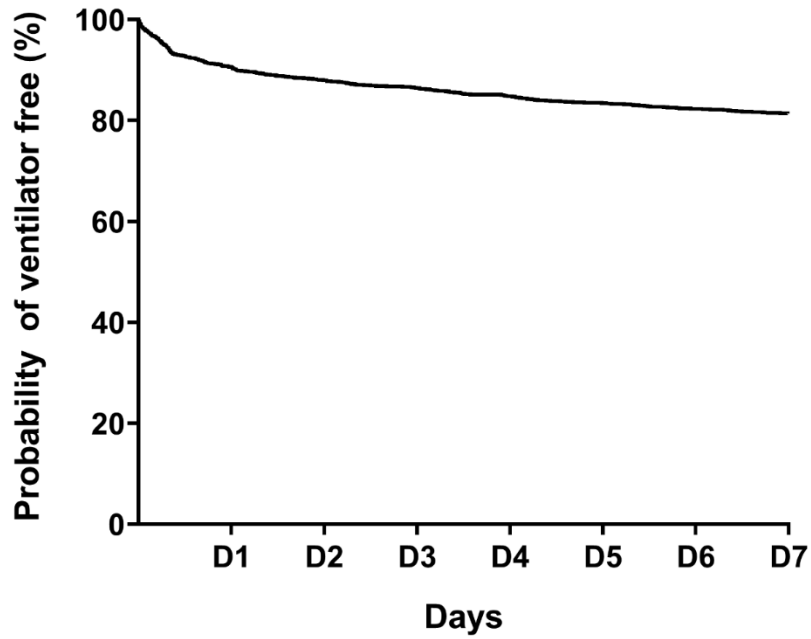

**No. at risk**    3311    3214    3159    3100    3050    3010    2976

**Supplemental Figure 6. Extubation outcome of extubation in the 3,657 critically ill ventilated patients with extubation during admission**
